# Supplementary figures and images for: Melittin-encapsulating peptide hydrogels for enhanced delivery of impermeable anticancer peptides
Source: Royal Society of Chemistry journal article supplement (doi:10.1039/c9bm02080b), 2020-01-01

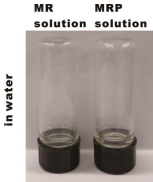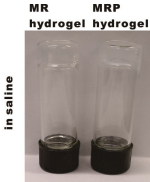

Supplement: c9bm02080b2.pdf [file c9bm02080b2.pdf]

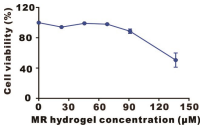

Supplement: c9bm02080b3.pdf [file c9bm02080b3.pdf]
